# Supplementary material for: The Interplay of Adhesion, Friction, and Nutrient Availability in Modulating Biofilm Wrinkling Behavior
Source: Research Square preprint supplement (doi:10.21203/rs.3.rs-6479400/v1), 2025-05-20
Supplement: Supplementary file 1 [file b7d5d926842fc0248d664064.docx]

**Supplementary Information**

**for**

The Interplay of Adhesion, Friction, and Nutrient Availability in Modulating Biofilm Wrinkling Behavior

Akhilesh Kumar Verma1, Abhirup Mookherjee2, Carolina Tropini,3,4,5 Diana Fusco2, Luis Ruiz Pestana1*

1Department of Civil and Architectural Engineering, University of Miami, Coral Gables, USA

2Cavendish Laboratory, Department of Physics, University of Cambridge, Cambridge, UK

3School of Biomedical Engineering, University of British Columbia, Vancouver, CA

4Department of Microbiology and Immunology, University of British Columbia, Vancouver, Canada

5CIFAR Humans & the Microbiome Program, CIFAR, Toronto, Canada

Corresponding Author

*Luis Ruiz Pestana: (Email: lar181@miami.edu)

**Table of Contents:**

1. Parameters for the Biofilm Model
2. Derivation of the spring constants in the interaction potentials
3. Stress Calculation in the Discrete Model
4. Initial System Size Effects
5. Correlation Between Local Adhesion and Wrinkle Nucleation
6. **Parameters for the Biofilm Model**

This section summarizes all the quantitative inputs of our computational model.

**Table SI.1:** Experimentally quantities used directly or for deriving model parameters.

| **Symbol** | **Parameter** | **Model Value** | **Experimental range** |
| --- | --- | --- | --- |
|  | Thickness |  | (1) |
|  | Shear modulus |  | (1) |
|  | Density |  | (2) |
|  | Nutrients diffusion constant |  | (3) |
|  | Adhesion energy |  | (4) |
|  | Poisson ratio |  | (5) |

**Table SI.2:** Discretization and geometrical parameters of the model

| **Symbol** | **Description** | **Model Value** |
| --- | --- | --- |
|  | Initial node spacing in the biofilm triangular lattice |  |
|  | Grid spacing for nutrient diffusion across the substrate |  |
|  | Biofilm initial radius |  |

**Table SI.3:** Parameters associated with nutrient uptake and biomass production

| **Symbol** | **Parameter** | **Model Value** | **Usage** |
| --- | --- | --- | --- |
|  | Maximum growth rate | 1/3600 | Eq. (9) |
|  | Half velocity constant | for time independent nutrients  for time dependent nutrients |
|  | Yield coefficient |  | Eq. (8) |

**Tables SI.4.** Parameters of the internodal potentials

| **Symbol** | **Parameter** | **Model Value** | **Usage** |
| --- | --- | --- | --- |
|  | In-plane spring stiffens |  | Eq. (2) |
|  | Out of plane spring stiffness |  | Eq. (3) |
|  | Distance at which the adhesion energy becomes zero |  | Eq. (4) |
| C | Parameter in adhesive potential |  |
|  | Potential depth |  |
|  | Parameter in adhesive potential |  |

**II. Derivation of the spring constants in the interaction potentials**

Previous studies on the mechanical properties of lattice models (6) have shown that the spring constant, , corresponding to the bond potential described in Eq (3) in the main text is related to the Young’s modulus of the biofilm, , the undeformed bond length, , and the cross-sectional area, , where is is the biofilm thickness, according to:

|  | (SI.1) |
| --- | --- |

For isotropic, homogeneous, and linearly elastic materials: , where the shear modulus and the Poisson ratio are experimentally measurable (see Table SI.1). It is important to note that for the triangular topology of the network used here,(6) and therefore is not a tunable parameter.

The derivation of spring constant, , corresponding to the improper angle potential described in Eq (3) and illustrated in Fig. 2B is as follows. At the continuum level, for a thin plate, the relationship between the bending moment, and curvature, , can be written as(7):

|  | (SI.2) |
| --- | --- |

Where is the cross-sectional second moment of inertia. The bending moment developed by the spring potential shown in Eq. 3, is:

|  | (SI.3) |
| --- | --- |

and the curvature in the deformed configuration of the system illustrated in Fig. 2B can be approximated as:

|  | (SI.4) |
| --- | --- |

Where . Substituting equation SI.4 into SI.2, and equating SI.2 and SI.3, the spring constant becomes:

|  | (SI.5) |
| --- | --- |

The first term within brackets, which introduces non-linearities on the bending stiffness, is of order unity for small bending angles. It is worth noting that the bending stiffness of biofilms has not been characterized, and an accurate theoretical formulation based on the microstructure of the ECM is currently missing. Therefore, and without loss of generality, we just calculate using the continuum mechanics formulation for a rectangular cross-section: and approximate by:

|  | (SI.5) |
| --- | --- |

**III. Stress Calculation in the Discrete Model**

We calculate the stresses in the different nodes of the system using the Virial expression o which are inherently continuum quantities, based on the forces acting on the nodes of the biofilm lattice. This is done using the Virial expression for the energy associated to a given node:

|  | (12) |
| --- | --- |

Where is the number of bonds associated to a given node, and each represent one of the Cartesian directions, either or , is the force acting on node *i* along direction , and is the component of the position vector of node . The stress tensor simply becomes , where *V* is the volume associated with the deformed configuration of the hexagonal domain associated to the node. We calculate the principal stresses at any given node ( and , the latter being the maximum compressive stress acting on the node), as well as the radial and hoop stresses, and , respectively, using conventional continuum mechanics formulations.

**IV. Initial System Size Effects.**

In our simulations, the measured critical radius () can be biased by the initial biofilm radius () as ​ cannot be smaller than ​. When compressive stresses build up rapidly—such as when is large and/or friction is high­—buckling occurs almost immediately, causing ​ to approach ​, which then acts as an asymptotic lower bound. However, below a certain threshold of , further reductions in will no longer affect ​. To demonstrate this behavior, we simulated biofilm wrinkling for four levels of friction (), across a range of initial radii ( = , and ) while keeping all other parameters constant. The results in **Fig. SI.1** show that the scaling predicted by classical buckling theories ( )—expected for low adhesion conditions ( in all the simulations shown in **Fig. SI.1**)—can be extended to arbitrarily smaller . In contrast, **Fig. 2** of the main text, shows an apparent loss of scaling as approaches the initial biofilm radius ( = ).

Furthermore, **Fig. SI.1** we observe an interesting effect, which is that the curves consist of two regimes. Below a certain threshold for (which increases with decreasing friction) the curves adhere to the . Above that threshold, however, the seems to saturate, over even slightly increase with . This suggests that the length scale that governs buckling ceases to be the global length scale,, which leads to the saturation of saturate. The exact nature and what controls the local length scale governing buckling will require further study.

**Figure SI.1**: Critical stress versus critical radius f for simulations with four friction levels , and eight different initial biofilm radii ( = , and ). Adhesion is the same for all cases: .

**V. Correlation Between Local Adhesion and Wrinkle Nucleation**

To test whether wrinkles preferentially nucleate in regions of lower adhesion, we computed the relative deviation of the local adhesion energy at the first wrinkle nucleation site, , from the mean adhesion energy, defined as: . As shown in **Fig. SI.3**, nearly all simulations—except for a few low-heterogeneity cases (which we expect to resolve with additional sampling)—exhibit negative values , indicating that wrinkles form in areas where local adhesion is significantly lower than the mean. Furthermore, a correlation is observed between and the coefficient of variation , with higher heterogeneity generally leading to more pronounced negative deviations.

**Figure SI.3**: Relative deviation of the local adhesion energy at the first wrinkle nucleation site, , from the mean adhesion energy, , plotted versus the coefficient of the variation , a measure of adhesion heterogeneity.

**References**

1. Yan J, Fei C, Mao S, Moreau A, Wingreen NS, Košmrlj A, et al. Mechanical instability and interfacial energy drive biofilm morphogenesis. Laub MT, Barkai N, Hammer B, editors. eLife. 2019 Mar 8;8:e43920.

2. Karampatzakis A, Song CZ, Allsopp LP, Filloux A, Rice SA, Cohen Y, et al. Probing the internal micromechanical properties of Pseudomonas aeruginosa biofilms by Brillouin imaging. npj Biofilms and Microbiomes. 2017 Sep 8;3(1):20.

3. Schluter J, Nadell CD, Bassler BL, Foster KR. Adhesion as a weapon in microbial competition. The ISME Journal. 2015 Jan 1;9(1):139–49.

4. Yan J, Moreau A, Khodaparast S, Perazzo A, Feng J, Fei C, et al. Bacterial Biofilm Material Properties Enable Removal and Transfer by Capillary Peeling. Advanced Materials. 2018 Nov 1;30(46):1804153.

5. C F, S M, J Y, R A, HA S, BL B, et al. Nonuniform growth and surface friction determine bacterial biofilm morphology on soft substrates. Proceedings of the National Academy of Sciences of the United States of America. 2020 Apr;117(14):7622–32.

6. Ostoja-Starzewski M. Lattice models in micromechanics. Applied Mechanics Reviews. 2002 Jan 1;55(1):35–60.

7. Appendix B: Plate Buckling Under Uniaxial Compression. In: Mechanics of Optimal Structural Design [Internet]. 2009 [cited 2025 Jan 22]. p. 525–35. Available from: https://doi.org/10.1002/9780470749784.app2

8. Jayathilake PG, Gupta P, Li B, Madsen C, Oyebamiji O, González-Cabaleiro R, et al. A mechanistic Individual-based Model of microbial communities. PloS one. 2017;12(8):e0181965.
